# Supplementary material for: Hydrophobization of lignocellulosic materials part II: chemical modification
Source: Springer Nature journal article supplement (doi:10.1007/s10570-022-04824-y), 2022-09-05
Supplement: MOESM1 [file 23456742]

## Hydrophobization of lignocellulosic materials part II – chemical modification

Sandra Rodríguez-Fabía<sup>a)\*</sup>, Jonathan Torstensen<sup>b)</sup>, Lars Johansson<sup>a)</sup>, Kristin Syverud<sup>a,c)</sup>

a) RISE PFI, Trondheim, Norway

b) Western Norway University of Applied Sciences, Bergen, Norway

c) Department of Chemical Engineering, NTNU, Trondheim, Norway

\* sandra.fabia@rise-pfi.no

Table 1 . Overview of modifications of cellulosic materials by esterification. Thermomechanical pulp (TMP), chemi-thermomechanical pulp (CTMP), microcrystalline cellulose (MCC), cellulose nanocrystal (CNC), cellulose nanostructures (CNS), bacterial nanocellulose (BNC), vegetal cellulose (VC), trifluoroacetic anhydride (TFAA), microfibrillated cellulose (MFC), cellulose nanowhiskers (CNW).

| Cellulose source/<br>substrate                     | Type of cellulose | Esterifying agent       | Degree of substitution (DS)                                                                            | Contact angle (°)             | Ref.                        |
|----------------------------------------------------|-------------------|-------------------------|--------------------------------------------------------------------------------------------------------|-------------------------------|-----------------------------|
| <b>Surface</b>                                     |                   |                         |                                                                                                        |                               |                             |
| Unbleached spruce TMP                              | Fibers            | AcOH                    | 0.05-0.62*                                                                                             |                               | (Paulsson et al. 1994)      |
| Bleached spruce TMP                                |                   |                         | 0.0-0.67*                                                                                              |                               |                             |
| Bleached aspen CTMP                                |                   |                         | 0.03-0.29*                                                                                             |                               |                             |
| Tunicin                                            | MCC               | AcOH /Ac <sub>2</sub> O | Homogeneous: 2.81<br>Heterogeneous: 2.3                                                                |                               | (Sassi and Chanzy 1995)     |
| Cellulosic waste materials                         | CNC               | Ac <sub>2</sub> O       | 2.18                                                                                                   | 76.54                         | (Abraham et al. 2016)       |
| Avicel                                             | CNC               | Ac <sub>2</sub> O       | 0.32-1.98                                                                                              |                               | (Wu et al. 2018)            |
| MCC from bleached kraft pulp of eucalyptus         | CNS               | AcOH /Ac <sub>2</sub> O | Hydrolysis of MCC with H <sub>2</sub> SO <sub>4</sub> : 1.5-2.1<br>Hydrolysis of MCC with HCl: 1.4-1.8 |                               | (Barbosa et al. 2019)       |
| Avicel                                             | CNC               | AcOH /Ac <sub>2</sub> O | 0.18, 0.42                                                                                             |                               | (Xu et al. 2020)            |
| MCC from wood pulp                                 | CNC               | Ac <sub>2</sub> O       | 0.18, 0.34                                                                                             |                               | (Ávila Ramírez et al. 2017) |
| Bleached beech dissolving pulp, non-bleached beech | Fibers            | N-acetylimidazole       | 0.17                                                                                                   | Beached: 50<br>Unbleached: 73 | (Beaumont et al. 2020)      |

|                                                    |                     |                                      |                                           |                                                    |                             |
|----------------------------------------------------|---------------------|--------------------------------------|-------------------------------------------|----------------------------------------------------|-----------------------------|
| organosolv pulp                                    |                     |                                      |                                           |                                                    |                             |
| Avicel, sugar cane bagasse                         | MCC, fibers         | Octadecanoyl chloride                |                                           | 76-88                                              | (Pasquini et al. 2006)      |
|                                                    |                     | Dodecanoyl chloride                  |                                           | 76-83                                              |                             |
| Cotton fabric                                      | Fibers              | Chloroacetyl chloride                |                                           | 110                                                | (Jantas and Górna 2006)     |
| Never-dried bleached beech sulfite dissolving pulp | Fibers              | N-acetylimidazole                    | 0.17                                      | 52                                                 | (Beaumont et al. 2021b)     |
|                                                    |                     | N-isobutylimidazole                  | 0.10                                      | 61                                                 |                             |
|                                                    |                     | N-succinylimidazole                  | 0.25                                      |                                                    | (Beaumont et al. 2021c)     |
| BNC from Nata-de-coco                              | Homogenized BNC     | AcOH                                 | 0.0051**                                  | 75***                                              | (Lee et al. 2011)           |
|                                                    |                     | Hexanoic acid                        | 0.0029**                                  | 92***                                              |                             |
|                                                    |                     | Dodecanoic acid                      | 0.0027**                                  | 133***                                             |                             |
| BNC                                                | Homogenized BNC     | AcOH /Ac <sub>2</sub> O              | 0-0.73                                    | DS <sub>0.25</sub> = 81<br>DS <sub>0.63</sub> = 88 | (Ávila Ramírez et al. 2016) |
| BNC, α-cellulose (VC)                              | BNC, fibers         | Ac <sub>2</sub> O                    | BNC: 0.17<br>VC: 0.10                     | BNC: 79<br>VC: 80                                  | (Tomé et al. 2011)          |
|                                                    |                     | Butyric anhydride                    | BNC: 0.24<br>VC: 0.22                     | BNC: 95<br>VC: 102                                 |                             |
|                                                    |                     | Hexanoic anhydride                   | BNC: 0.13<br>VC: 0.12                     | BNC: 104<br>VC: 105                                |                             |
|                                                    |                     | ASA                                  | BNC: 0.04<br>VC: 0.06                     | BNC: 97<br>VC: 95                                  |                             |
|                                                    |                     | Hexanoyl chloride                    | BNC: 0.17<br>VC: 0.02                     | BNC: 109<br>VC: 113                                |                             |
| Avicel                                             | MCC                 | Trimethylsilyl-diazomethane          |                                           |                                                    | (Müller et al. 2010)        |
| Filter paper, tunicate                             | Fibers, nanofibers  | AcOH/ TFAA<br>Ac <sub>2</sub> O/TFAA | AcOH/TFAA<br>Bulk: 0.082<br>Surface: 1.09 | Filter paper> 90                                   | (Yuan et al. 2005)          |
| Kraft pulp of Norway spruce                        | MFC                 | TFAA/AcOH                            |                                           | 66.6-89.7                                          | (Rodionova et al. 2013)     |
|                                                    |                     | TFAA/Ac <sub>2</sub> O               |                                           | 83.3-96.9                                          |                             |
| Pine cellulose                                     | Cellulose particles | Palmitoyl chloride                   | 0.01-0.14                                 | 98-109                                             | (David et al. 2019)         |
| Never-dried hardwood pulp                          | MFC                 | Palmitoyl chloride                   | 0.04-2.36                                 |                                                    | (Fumagalli et al. 2013a)    |
| Cotton linters                                     | CNC                 | Palmitoyl chloride                   | 0.07-2.50                                 |                                                    | (Fumagalli et al. 2013b)    |
| Never-dried hardwood pulp                          | MFC                 | Palmitoyl chloride                   | 0.98                                      |                                                    | (Fumagalli et al. 2015)     |
|                                                    |                     | Decanoyl chloride                    | 1.01                                      |                                                    |                             |
|                                                    |                     | Sebacoyl chloride                    | 0.15                                      |                                                    |                             |
|                                                    |                     | (2-dodecen-1-yl) succinic anhydride  | 0.13                                      |                                                    |                             |

|                                                                         |                   |                                     |                                                    |                                                    |                            |
|-------------------------------------------------------------------------|-------------------|-------------------------------------|----------------------------------------------------|----------------------------------------------------|----------------------------|
| Avicel                                                                  | CNW               | Vinyl acetate                       |                                                    |                                                    | (Çetin et al. 2009)        |
| Prehydrolyzed kraft rayon-grade dissolving eucalyptus dry lap wood pulp | CNC               | Canola oil fatty acid methyl esters |                                                    | 68                                                 | (Wei et al. 2017)          |
| Cellulose powder                                                        | Nanofibers        | Hexanoyl chloride                   | 0.58                                               |                                                    | (Huang et al. 2012)        |
| Cellulose powder                                                        | Nanofibers        | Pentafluorobenzoyl chloride         | Reaction in toluene: 0.20<br>Reaction in DMF: 0.57 | Reaction in toluene: 133<br>Reaction in DMF: 102.7 | (Rao et al. 2015)          |
| Totally chlorine free-bleached beech sulfite dissolving pulp            | Fibers            | N-acetylimidazole                   | 0.49                                               | ~134                                               | (Beaumont et al. 2021a)    |
| <b>Bulk</b>                                                             |                   |                                     |                                                    |                                                    |                            |
|                                                                         | CNC               | Ac <sub>2</sub> O                   | 2.16                                               |                                                    | (Li et al. 2019)           |
| Viscose rayon (staple fiber)                                            | Fibers            | AcOH                                | 3                                                  |                                                    | (Shimizu and Hayashi 1988) |
| Bleached sulfite pulp                                                   |                   |                                     | 2.44<br>Mercerized before modification: ~3         |                                                    |                            |
| Cotton linter                                                           |                   |                                     | 2.10<br>Mercerized before modification: ~3         |                                                    |                            |
| Highly purified bleached sulfite pulp                                   | Fibers            | Undecylenic acid                    | 0.47, 1.11                                         |                                                    | (Jandura et al. 2000)      |
|                                                                         |                   | Undecanoic acid                     | 0.31, 0.59                                         |                                                    |                            |
|                                                                         |                   | Oleic acid                          | 0.08, 0.14                                         |                                                    |                            |
|                                                                         |                   | Stearic acid                        | 0.12, 0.19                                         |                                                    |                            |
| Kenaf bast fibers                                                       | Fibers            | Ac <sub>2</sub> O                   | 1.16                                               | 113                                                | (Jonoobi et al. 2010)      |
|                                                                         | Nanofibers        |                                     | 1.07                                               | 115                                                |                            |
| Wheat fibers                                                            | Fibers/nanofibers | Succinic anhydride                  | 0.67                                               |                                                    | (Sehaqui et al. 2017)      |
|                                                                         |                   | Maleic anhydride                    | 0.15                                               |                                                    |                            |
|                                                                         |                   | Phthalic anhydride                  | 0.17                                               |                                                    |                            |
| <i>Posidonia oceanica</i>                                               | Fibers            | Succinic anhydride                  | 0-2.24                                             |                                                    | (Chadlia and Farouk 2011)  |
|                                                                         |                   | Maleic anhydride                    | 0.04-1.59                                          |                                                    |                            |
|                                                                         |                   | Phthalic anhydride                  | 0.12-1.5                                           |                                                    |                            |
| MCC                                                                     | MCC               | Stearoyl chloride                   | 2.95                                               | 158                                                | (Geissler et al. 2013)     |
| MCC                                                                     | MCC               | Vinyl laureate                      | 1.47-2.74                                          | 96.3-120.7                                         | (Wen et al. 2017)          |

\*Calculated based on the formula from (Fumagalli et al. 2013b)

\*\*Calculated based on the calculations of (Cunha et al. 2014) and using the specific surface area from (Lee and Bismarck 2012).

\*\*\*Advancing contact angles

Table 2. Overview of modifications of cellulosic materials by silylation. Trichloromethylsilane (TCMS), microcrystalline cellulose (MCC), cellulose nanocrystal (CNC), bacterial nanocellulose (BNC), methyltrimethoxysilane (MTMS), hexamethyldisilazane (HMDS), *n*-dodecyltrimethoxysilane (*n*-DDTS), and perfluorooctyltriethoxysilane (PFTS), butyltrichlorosilane (BTCS), 3,3,3-trifluoropropyl trimethoxysilane (TFPS) and 1H,1H,2H,2H-perfluorooctyl trimethoxysilane (PFOTMS), cellulose nanofiber (CNF), microfibrillated cellulose (MFC), (3-aminopropyl)-trimethoxysilane (APTES), chlorodimethyl isopropylsilane (CDMIPS).

| Cellulose source                                                                                                 | Type of cellulose | Silylating agent                          | DS                             | CA (°)                                        | Ref.                   |
|------------------------------------------------------------------------------------------------------------------|-------------------|-------------------------------------------|--------------------------------|-----------------------------------------------|------------------------|
| <b>Surface</b>                                                                                                   |                   |                                           |                                |                                               |                        |
| Whatman filter paper                                                                                             | Fibers            | TCMS                                      |                                | 125-136                                       | (Cunha et al. 2010)    |
| Whatman filter paper                                                                                             | Fibers            | MTMS,<br>HMDS,<br><i>n</i> -DDTS,<br>PFTS |                                | 124-146                                       | (Yu et al. 2019)       |
| MCC                                                                                                              | MCC               |                                           |                                | 94-133                                        |                        |
| Viscose rayon                                                                                                    | Fibers            |                                           |                                | 90-147                                        |                        |
| Regenerated cellulose                                                                                            | Fibers            |                                           |                                | 102-120                                       |                        |
| CNC                                                                                                              | CNC               |                                           |                                | 123-136                                       |                        |
| BNC                                                                                                              | BNC               |                                           |                                | 0-136                                         |                        |
| Cotton                                                                                                           | Fibers            | TCMS                                      | 0.10                           | 101                                           | (Jarrah et al. 2018)   |
|                                                                                                                  |                   | Dichlorodimethyl silane                   | 0.29                           | 97                                            |                        |
|                                                                                                                  |                   | BTCS                                      | 0.08                           | 110                                           |                        |
|                                                                                                                  |                   | Trichloro(3,3,3-trifluoropropyl)silane    | 0.13                           | 59                                            |                        |
| Paper from northern bleached softwood Kraft fibers mixed with 15% bleached softwood/85% bleached hardwood fibers | Fibers            | TCMS                                      |                                | ~150                                          | (Tang et al. 2016)     |
|                                                                                                                  |                   | BTCS                                      |                                | ~125                                          |                        |
|                                                                                                                  |                   | Dodecyltrichlorosilane                    |                                | ~130                                          |                        |
|                                                                                                                  |                   | Octadecyltrichlorosilane                  |                                | ~140                                          |                        |
| Avicel                                                                                                           | MCC, fibers       | TFPS, PFOTMS                              |                                | TFPS:115<br>PFOTMS:125                        | (Ly et al. 2010)       |
| Whatman filter paper                                                                                             |                   |                                           |                                | TFPS:116<br>PFOTMS:129                        |                        |
| Chlorine free cellulose pulp (spruce (60–70%) and pine fibers (30–40%))                                          | CNF               | TCMS                                      | Total: 1-6%<br>Surface: 21-97% | Dense films: 150-160<br>Porous films: 157-163 | (Orsolini et al. 2018) |
| Recycled box board                                                                                               | CNF               | 50% MTMS / 50% HDTMS                      | 6.27 at-%                      | 107.2                                         | (Laitinen et al. 2017) |
| Recycled milk container                                                                                          |                   |                                           | 4.80 at-%                      | 129.4                                         |                        |
| Fluting board                                                                                                    |                   |                                           | 5.00 at-%                      | 159.0                                         |                        |
| Bleached birch kraft pulp sheets                                                                                 |                   |                                           | 4.47 at-%                      | 142.9                                         |                        |
| Canola straw fibers                                                                                              | CNF               | HDTMS                                     |                                | 121.1-138.9                                   | (Rafieian et al. 2018) |
| Unbleached long fiber of <i>Pinus elliotii</i>                                                                   | CNF               | MTMS                                      |                                | Bulk: 110.24,<br>113.16<br>Surface: 119.85    | (Lazzari et al. 2017)  |

|                                                           |        |                                                         |                |                                       |                               |
|-----------------------------------------------------------|--------|---------------------------------------------------------|----------------|---------------------------------------|-------------------------------|
| Pulp powder from oat straw                                | CNF    | MTMS                                                    | 0-38 wt% Si    | 105-136                               | (Zhang et al. 2014)           |
| Recycled cellulose fibers from paper waste                | Fibers | MTMS                                                    |                | External: 153.5<br>Internal: 150.8    | (Feng et al. 2015)            |
| Recycled cellulose fibers from paper waste, cotton fibers | Fibers | MTMS                                                    |                | 130.3-142.8                           | (Cheng et al. 2017)           |
| Never-dried ECF-bleached birch kraft pulp                 | CNF    | (tridecafluoro-1,1,2,2-tetrahydrooctyl) trichlorosilane |                | 160                                   | (Jin et al. 2011)             |
| Nata de coco (BNC)                                        | CNF    | Trimethylchlorosilane/triethylamine                     | 0.075-0.132    | 137.1-146.5                           | (Sai et al. 2015)             |
| Bleached and unbleached <i>Pinus radiata</i> pulp fibers  | MFC    | HMDS                                                    |                | Bleached: 89-101<br>Unbleached: 88-97 | (Chinga-Carrasco et al. 2012) |
| Never dried birch pulp                                    | CNF    | HMDS                                                    | 0.05-0.3*      | ~70                                   | (Peresin et al. 2017)         |
|                                                           |        | APTES                                                   | 0.5-0.7*       | ~60                                   |                               |
| Sugar beet pulp pulp                                      | MFC    | CDMIPS                                                  | ~0.04-0.36     |                                       | (Goussé et al. 2004)          |
| Bleached softwood sulfite pulp                            | MFC    | CDMIPS                                                  | 0.03-0.95      | 117-146                               | (Andresen et al. 2006)        |
| Cellulose pulp powder from oat straw                      | CNF    | MTMS                                                    | 17.4 wt%       | 110-147                               | (Zhang et al. 2015)           |
| BNC                                                       | BNC    | MTMS                                                    | 0.41-5.90      |                                       | (Kono et al. 2020)            |
| Cellulose II gel                                          |        | 3-azidopropyl triethoxysilane                           | 1.2 mmol Si/g  |                                       | (Beaumont et al. 2018)        |
| Never-dried beech sulfite dissolving pulp                 | CNF    |                                                         | 0.52 mmol Si/g |                                       |                               |
| Carboxymethylated pulp                                    | Fiber  |                                                         | 0.23 mmol Si/g |                                       |                               |

\*Surface values determined by XPS

Table 3. Gas permeances of lignocellulosic and plastic materials Low-density polyethylene (LDPE), high-density polyethylene (HDPE), polyethylene terephthalate (PET), cellulose nanofiber (CNF), TEMPO-oxidized cellulose nanofibril (TOCNF), polyethylene (PE), polystyrene (PS), water vapor transmission rate (WVTR), microfibrillated cellulose (MFC), polypropylene (PP).

| Material                                          | O <sub>2</sub><br>(mL×cm/(m <sup>2</sup> ×<br>24hr×atm)) | Original value<br>(unit)                                        | Conversion factor                                                                                                                | Ref.                                        |
|---------------------------------------------------|----------------------------------------------------------|-----------------------------------------------------------------|----------------------------------------------------------------------------------------------------------------------------------|---------------------------------------------|
| LDPE                                              | 16.6 <sup>b</sup>                                        | 16.6 mL(STP)<br>cm/(m <sup>2</sup><br>24 h × atm)               | 1                                                                                                                                | (Wang et al.<br>1998)                       |
| LDPE <sup>a</sup>                                 | 12.0 <sup>b</sup>                                        | 12.0 mL(STP)<br>cm/(m <sup>2</sup><br>24 h × atm)               | 1                                                                                                                                |                                             |
| HDPE                                              | 2.6 <sup>b</sup>                                         | 2.6 mL(STP)<br>cm/(m <sup>2</sup><br>24 h × atm)                | 1                                                                                                                                |                                             |
| Microfibrillated<br>CNF films                     | >10 <sup>c</sup>                                         | >1000 mL(STP)<br>μm/(m <sup>2</sup> day× kPa)                   | 10 <sup>-4</sup><br>(cm/μm)/0.00986923<br>(atm/kPa) = 0.01                                                                       | (Fukuzumi et<br>al. 2011)                   |
| Cellophane                                        | 5×10 <sup>-4c</sup>                                      | 0.05 mL(STP)<br>μm/(m <sup>2</sup> day× kPa)                    | 10 <sup>-4</sup><br>(cm/μm)/0.00986923<br>(atm/kPa) = 0.01                                                                       |                                             |
| Tunicate TOCNF                                    | >10 <sup>c</sup>                                         | >1000 mL(STP)<br>μm/(m <sup>2</sup> day× kPa)                   | 10 <sup>-4</sup><br>(cm/μm)/0.00986923<br>(atm/kPa) = 0.01                                                                       |                                             |
| Wood-TOCNF                                        | 6×10 <sup>-5c</sup>                                      | 0.006 mL(STP)<br>μm/(m <sup>2</sup> day× kPa)                   | 10 <sup>-4</sup><br>(cm/μm)/0.00986923<br>(atm/kPa) = 0.01                                                                       |                                             |
| PET, Nylon, PE,<br>PS                             | <1 <sup>d</sup>                                          | <2.88×10 <sup>-13</sup><br>mL(STP)<br>cm/(cm <sup>2</sup> s×Pa) | 1/(10 <sup>-4</sup> m <sup>2</sup> /cm <sup>2</sup><br>×1/3600day/s × 9.9 ×<br>10 <sup>-6</sup> atm/Pa) = 3.6 × 10 <sup>12</sup> |                                             |
| Material                                          | Water<br>(WVTR,<br>mg×cm/(m <sup>2</sup> ×2<br>4hr))     | Original value<br>(unit)                                        | Conversion factor                                                                                                                | Ref.                                        |
| Cellulose acetate<br>with various<br>compositions | < 988                                                    | <5.28 mg/(h×cm <sup>2</sup> )                                   | 30×10 <sup>-4</sup> cm /((3.86 cm <sup>2</sup><br>/10 <sup>4</sup> ) × (1/24)day/h)                                              | (Sprockel et al.<br>1990)                   |
| MFC/CNF films                                     | < 130                                                    | 51-52 g/(m <sup>2</sup> × day)                                  | 1000mg/g × 0.0025<br>cm/μm = 2.5                                                                                                 | (Kumar et al.<br>2014)                      |
| PET, PE, PP                                       | <20                                                      | <0.2 g × mm/(m <sup>2</sup> ×<br>day)                           | 1000 mg/g ×0.1cm/mm<br>= 100                                                                                                     | (Bhadha 1999,<br>Keller and<br>Kouzes 2017) |

| Material                                     | CO <sub>2</sub><br>(mL×cm/(m <sup>2</sup> ×<br>24hr×atm)) | Original value<br>(unit)                                                                 | Conversion factor                                                                                                                  | Ref.                       |
|----------------------------------------------|-----------------------------------------------------------|------------------------------------------------------------------------------------------|------------------------------------------------------------------------------------------------------------------------------------|----------------------------|
| PET, Nylon, PE,<br>PS                        | < 3.6 <sup>d</sup>                                        | < 10 <sup>-12</sup> mL × cm/(s<br>×cm <sup>2</sup> × Pa)                                 | 1/(10 <sup>-4</sup> m <sup>2</sup> /cm <sup>2</sup> × 1/3600<br>day/s × 9.9 × 10 <sup>-6</sup><br>atm/Pa) = 3.6 × 10 <sup>12</sup> | (Guisheng et<br>al. 1995)  |
| Cellulose acetate<br>and ethyl-<br>cellulose | <1.4                                                      | < 5 × 10 <sup>-10</sup> cm <sup>3</sup> ×<br>cm/(s × cm <sup>2</sup> ×<br>cmHg) (barrer) | 1/(1/3600 day/s × 10 <sup>-4</sup><br>m <sup>2</sup> /cm <sup>2</sup> × 0.013<br>atm/cmHg) = 2.8 × 10 <sup>9</sup>                 | (Sanaeepur et<br>al. 2015) |

<sup>a)</sup> The LDPE in this study had different densities <sup>b)</sup> Gas permeation values detected at 23-25 °C, ambient. <sup>c)</sup> Gas permeation values detected at 23 °C and 0 % relative humidity. <sup>d)</sup> at 30 °C, ambient. The wording “day” is assumed to be 24 hours.

## References

Abraham, E, Kam, D, Nevo, Y, Slattegard, R, Rivkin, A, Lapidot, S and Shoseyov, O (2016). Highly Modified Cellulose Nanocrystals and Formation of Epoxy-Nanocrystalline Cellulose (CNC) Nanocomposites. *ACS Applied Materials & Interfaces* 8(41): 28086-28095.DOI: 10.1021/acsami.6b09852

Andresen, M, Johansson, L-S, Tanem, B S and Stenius, P (2006). Properties and characterization of hydrophobized microfibrillated cellulose. *Cellulose* 13(6): 665-677.DOI: 10.1007/s10570-006-9072-1

Ávila Ramírez, J A, Fortunati, E, Kenny, J M, Torre, L and Foresti, M L (2017). Simple citric acid-catalyzed surface esterification of cellulose nanocrystals. *Carbohydrate Polymers* 157: 1358-1364.DOI: <https://doi.org/10.1016/j.carbpol.2016.11.008>

Ávila Ramírez, J A, Gómez Hoyos, C, Arroyo, S, Cerrutti, P and Foresti, M L (2016). Acetylation of bacterial cellulose catalyzed by citric acid: Use of reaction conditions for tailoring the esterification extent. *Carbohydrate Polymers* 153: 686-695.DOI: <https://doi.org/10.1016/j.carbpol.2016.08.009>

Barbosa, R F S, Souza, A G, Ferreira, F F and Rosa, D S (2019). Isolation and acetylation of cellulose nanostructures with a homogeneous system. *Carbohydrate Polymers* 218: 208-217.DOI: <https://doi.org/10.1016/j.carbpol.2019.04.072>

Beaumont, M, Bacher, M, Opietnik, M, Gindl-Altmutter, W, Potthast, A and Rosenau, T (2018). A General Aqueous Silanization Protocol to Introduce Vinyl, Mercapto or Azido Functionalities onto Cellulose Fibers and Nanocelluloses. *Molecules* 23(6).DOI: 10.3390/molecules23061427

Beaumont, M, Jusner, P, Gierlinger, N, King, A W T, Potthast, A, Rojas, O J and Rosenau, T (2021a). Unique reactivity of nanoporous cellulosic materials mediated by surface-confined water. *Nature Communications* 12(1): 2513.DOI: 10.1038/s41467-021-22682-3



Beaumont, M, Otoni, C G, Mattos, B D, Koso, T V, Abidnejad, R, Zhao, B, Kondor, A, King, A W T and Rojas, O J (2021b). Regioselective and water-assisted surface esterification of never-dried cellulose: nanofibers with adjustable surface energy. *Green Chemistry* 23(18): 6966-6974. DOI: 10.1039/D1GC02292J

Beaumont, M, Tardy, B L, Reyes, G, Koso, T V, Schaubmayr, E, Jusner, P, King, A W T, Dagastine, R R, Potthast, A, Rojas, O J and Rosenau, T (2021c). Assembling Native Elementary Cellulose Nanofibrils via a Reversible and Regioselective Surface Functionalization. *Journal of the American Chemical Society* 143(41): 17040-17046. DOI: 10.1021/jacs.1c06502

Beaumont, M, Winklehner, S, Veigel, S, Mundigler, N, Gindl-Altmutter, W, Potthast, A and Rosenau, T (2020). Wet esterification of never-dried cellulose: a simple process to surface-acetylated cellulose nanofibers. *Green Chemistry* 22(17): 5605-5609. DOI: 10.1039/D0GC02116D

Bhadha, P M (1999). How weld hose materials affect shielding gas quality. *Welding journal* 78(7): 35-40

Çetin, N S, Tingaut, P, Özmen, N, Henry, N, Harper, D, Dadmun, M and Sèbe, G (2009). Acetylation of Cellulose Nanowhiskers with Vinyl Acetate under Moderate Conditions. *Macromolecular Bioscience* 9(10): 997-1003. DOI: 10.1002/mabi.200900073

Chadlia, A and Farouk, M H M (2011). Rapid homogeneous esterification of cellulose extracted from *Posidonia* induced by microwave irradiation. *Journal of Applied Polymer Science* 119(6): 3372-3381. DOI: 10.1002/app.32973

Cheng, H, Gu, B, Pennefather, M P, Nguyen, T X, Phan-Thien, N and Duong, H M (2017). Cotton aerogels and cotton-cellulose aerogels from environmental waste for oil spillage cleanup. *Materials & Design* 130: 452-458. DOI: <https://doi.org/10.1016/j.matdes.2017.05.082>

Chinga-Carrasco, G, Kuznetsova, N, Garaeva, M, Leirset, I, Galiullina, G, Kostochko, A and Syverud, K (2012). Bleached and unbleached MFC nanobarriers: properties and hydrophobisation with hexamethyldisilazane. *Journal of Nanoparticle Research* 14(12): 1280. DOI: 10.1007/s11051-012-1280-z

Cunha, A G, Freire, C, Silvestre, A, Neto, C P, Gandini, A, Belgacem, M N, Chaussy, D and Beneventi, D (2010). Preparation of highly hydrophobic and lipophobic cellulose fibers by a straightforward gas–solid reaction. *Journal of Colloid and Interface Science* 344(2): 588-595. DOI: <https://doi.org/10.1016/j.jcis.2009.12.057>

Cunha, A G, Zhou, Q, Larsson, P T and Berglund, L A (2014). Topochemical acetylation of cellulose nanopaper structures for biocomposites: mechanisms for reduced water vapour sorption. *Cellulose* 21(4): 2773-2787. DOI: 10.1007/s10570-014-0334-z

David, G, Gontard, N, Guerin, D, Heux, L, Lecomte, J, Molina-Boisseau, S and Angellier-Coussy, H (2019). Exploring the potential of gas-phase esterification to hydrophobize the surface of micrometric cellulose particles. *European Polymer Journal* 115: 138-146. DOI: <https://doi.org/10.1016/j.eurpolymj.2019.03.002>

- Feng, J, Nguyen, S T, Fan, Z and Duong, H M (2015). Advanced fabrication and oil absorption properties of super-hydrophobic recycled cellulose aerogels. *Chemical Engineering Journal* 270: 168-175.DOI: <https://doi.org/10.1016/j.cej.2015.02.034>
- Fukuzumi, H, Saito, T, Iwamoto, S, Kumamoto, Y, Ohdaira, T, Suzuki, R and Isogai, A (2011). Pore Size Determination of TEMPO-Oxidized Cellulose Nanofibril Films by Positron Annihilation Lifetime Spectroscopy. *Biomacromolecules* 12(11): 4057-4062.DOI: 10.1021/bm201079n
- Fumagalli, M, Ouhab, D, Boisseau, S M and Heux, L (2013a). Versatile Gas-Phase Reactions for Surface to Bulk Esterification of Cellulose Microfibrils Aerogels. *Biomacromolecules* 14(9): 3246-3255.DOI: 10.1021/bm400864z
- Fumagalli, M, Sanchez, F, Boisseau, S M and Heux, L (2013b). Gas-phase esterification of cellulose nanocrystal aerogels for colloidal dispersion in apolar solvents. *Soft Matter* 9(47): 11309-11317.DOI: 10.1039/C3SM52062E
- Fumagalli, M, Sanchez, F, Molina-Boisseau, S and Heux, L (2015). Surface-restricted modification of nanocellulose aerogels in gas-phase esterification by di-functional fatty acid reagents. *Cellulose* 22(3): 1451-1457.DOI: 10.1007/s10570-015-0585-3
- Geissler, A, Chen, L, Zhang, K, Bonaccorso, E and Biesalski, M (2013). Superhydrophobic surfaces fabricated from nano- and microstructured cellulose stearoyl esters. *Chemical Communications* 49(43): 4962-4964.DOI: 10.1039/C3CC41568F
- Goussé, C, Chanzy, H, Cerrada, M L and Fleury, E (2004). Surface silylation of cellulose microfibrils: preparation and rheological properties. *Polymer* 45(5): 1569-1575.DOI: <https://doi.org/10.1016/j.polymer.2003.12.028>
- Guisheng, F, Incarnato, L, Di Maio, L and Acierno, D (1995). Discussion about the use of relative values of permeabilities between two gases for high molecular weight polymers. *Polymer* 36(22): 4345-4346.DOI: [https://doi.org/10.1016/0032-3861\(95\)92232-4](https://doi.org/10.1016/0032-3861(95)92232-4)
- Huang, P, Wu, M, Kuga, S, Wang, D, Wu, D and Huang, Y (2012). One-Step Dispersion of Cellulose Nanofibers by Mechanochemical Esterification in an Organic Solvent. *ChemSusChem* 5(12): 2319-2322.DOI: <https://doi.org/10.1002/cssc.201200492>
- Jandura, P, Kokta, B V and Riedl, B (2000). Fibrous long-chain organic acid cellulose esters and their characterization by diffuse reflectance FTIR spectroscopy, solid-state CP/MAS <sup>13</sup>C-NMR, and X-ray diffraction. *Journal of Applied Polymer Science* 78(7): 1354-1365.DOI: 10.1002/1097-4628(20001114)78:7<1354::Aid-app60>3.0.Co;2-v
- Jantas, R and Górna, K (2006). Antibacterial finishing of cotton fabrics. *Fibres and Textiles in Eastern Europe* 14(1): 88
- Jarrah, K, Hisaindee, S and Al-Sayah, M H (2018). Preparation of oil sorbents by solvent-free grafting of cellulose cotton fibers. *Cellulose* 25(7): 4093-4106.DOI: 10.1007/s10570-018-1846-8
- Jin, H, Kettunen, M, Laiho, A, Pynnönen, H, Paltakari, J, Marmur, A, Ikkala, O and Ras, R H A (2011). Superhydrophobic and Superoleophobic Nanocellulose Aerogel Membranes as

Bioinspired Cargo Carriers on Water and Oil. *Langmuir* 27(5): 1930-1934.DOI: 10.1021/la103877r

Jonoobi, M, Harun, J, Mathew, A P, Hussein, M Z B and Oksman, K (2010). Preparation of cellulose nanofibers with hydrophobic surface characteristics. *Cellulose* 17(2): 299-307.DOI: 10.1007/s10570-009-9387-9

Keller, P E and Kouzes, R T (2017). Water vapor permeation in plastics, Pacific Northwest National Lab.(PNNL), Richland, WA (United States).

Kono, H, Uno, T, Tsujisaki, H, Anai, H, Kishimoto, R, Matsushima, T and Tajima, K (2020). Nanofibrillated Bacterial Cellulose Surface Modified with Methyltrimethoxysilane for Fiber-Reinforced Composites. *ACS Applied Nano Materials* 3(8): 8232-8241.DOI: 10.1021/acsanm.0c01670

Kumar, V, Bollström, R, Yang, A, Chen, Q, Chen, G, Salminen, P, Bousfield, D and Toivakka, M (2014). Comparison of nano- and microfibrillated cellulose films. *Cellulose* 21(5): 3443-3456.DOI: 10.1007/s10570-014-0357-5

Laitinen, O, Suopajarvi, T, Österberg, M and Liimatainen, H (2017). Hydrophobic, Superabsorbing Aerogels from Choline Chloride-Based Deep Eutectic Solvent Pretreated and Silylated Cellulose Nanofibrils for Selective Oil Removal. *ACS Applied Materials & Interfaces* 9(29): 25029-25037.DOI: 10.1021/acsmi.7b06304

Lazzari, L K, Zampieri, V B, Zanini, M, Zattera, A J and Baldasso, C (2017). Sorption capacity of hydrophobic cellulose cryogels silanized by two different methods. *Cellulose* 24(8): 3421-3431.DOI: 10.1007/s10570-017-1349-z

Lee, K-Y and Bismarck, A (2012). Susceptibility of never-dried and freeze-dried bacterial cellulose towards esterification with organic acid. *Cellulose* 19(3): 891-900.DOI: 10.1007/s10570-012-9680-x

Lee, K-Y, Quero, F, Blaker, J J, Hill, C A S, Eichhorn, S J and Bismarck, A (2011). Surface only modification of bacterial cellulose nanofibres with organic acids. *Cellulose* 18(3): 595-605.DOI: 10.1007/s10570-011-9525-z

Li, D, Zhou, J, Ma, X and Li, J (2019). Synthesis of a novel biocomposite of poly (3-hydroxybutyrate-co-3-hydroxyhexanoate) reinforced with acetylated cellulose nanocrystals. *Cellulose* 26(16): 8729-8743.DOI: 10.1007/s10570-019-02708-2

Ly, B, Belgacem, M N, Bras, J and Brochier Salon, M C (2010). Grafting of cellulose by fluorine-bearing silane coupling agents. *Materials Science and Engineering: C* 30(3): 343-347.DOI: <https://doi.org/10.1016/j.msec.2009.11.009>

Müller, Y, Tot, I, Potthast, A, Rosenau, T, Zimmermann, R, Eichhorn, K-J, Nitschke, C, Scherr, G, Freudenberg, U and Werner, C (2010). The impact of esterification reactions on physical properties of cellulose thin films. *Soft Matter* 6(15): 3680-3684.DOI: 10.1039/C0SM00005A

Orsolini, P, Antonini, C, Stojanovic, A, Malfait, W J, Caseri, W R and Zimmermann, T (2018). Superhydrophobicity of nanofibrillated cellulose materials through polysiloxane nanofilaments. *Cellulose* 25(2): 1127-1146.DOI: 10.1007/s10570-017-1636-8

- Pasquini, D, Belgacem, M N, Gandini, A and Curvelo, A A d S (2006). Surface esterification of cellulose fibers: Characterization by DRIFT and contact angle measurements. *Journal of Colloid and Interface Science* 295(1): 79-83.DOI: <https://doi.org/10.1016/j.jcis.2005.07.074>
- Paulsson, M, Sirnonson, R and Westernark, U (1994). Chemical modification of lignin-rich paper: Part 1. Acetylation of paper made from spruce TMP and aspen CTMP. Evaluation of paper properties. *Nordic Pulp & Paper Research Journal* 9(4): 232-236.DOI: [doi:10.3183/npprj-1994-09-04-p232-236](https://doi.org/10.3183/npprj-1994-09-04-p232-236)
- Peresin, M S, Kammiovirta, K, Heikkinen, H, Johansson, L-S, Vartiainen, J, Setälä, H, Österberg, M and Tammelin, T (2017). Understanding the mechanisms of oxygen diffusion through surface functionalized nanocellulose films. *Carbohydrate Polymers* 174: 309-317.DOI: <https://doi.org/10.1016/j.carbpol.2017.06.066>
- Rafieian, F, Hosseini, M, Jonoobi, M and Yu, Q (2018). Development of hydrophobic nanocellulose-based aerogel via chemical vapor deposition for oil separation for water treatment. *Cellulose* 25(8): 4695-4710.DOI: [10.1007/s10570-018-1867-3](https://doi.org/10.1007/s10570-018-1867-3)
- Rao, X, Kuga, S, Wu, M and Huang, Y (2015). Influence of solvent polarity on surface-fluorination of cellulose nanofiber by ball milling. *Cellulose* 22(4): 2341-2348.DOI: [10.1007/s10570-015-0659-2](https://doi.org/10.1007/s10570-015-0659-2)
- Rodionova, G, Hoff, B, Lenes, M, Eriksen, Ø and Gregersen, Ø (2013). Gas-phase esterification of microfibrillated cellulose (MFC) films. *Cellulose* 20(3): 1167-1174.DOI: [10.1007/s10570-013-9887-5](https://doi.org/10.1007/s10570-013-9887-5)
- Sai, H, Fu, R, Xing, L, Xiang, J, Li, Z, Li, F and Zhang, T (2015). Surface Modification of Bacterial Cellulose Aerogels' Web-like Skeleton for Oil/Water Separation. *ACS Applied Materials & Interfaces* 7(13): 7373-7381.DOI: [10.1021/acsami.5b00846](https://doi.org/10.1021/acsami.5b00846)
- Sanaeepur, H, Nasernejad, B and Kargari, A (2015). Cellulose acetate/nano-porous zeolite mixed matrix membrane for CO<sub>2</sub> separation. *Greenhouse Gases: Science and Technology* 5(3): 291-304.DOI: <https://doi.org/10.1002/ghg.1478>
- Sassi, J-F and Chanzy, H (1995). Ultrastructural aspects of the acetylation of cellulose. *Cellulose* 2(2): 111-127.DOI: [10.1007/bf00816384](https://doi.org/10.1007/bf00816384)
- Sehaqui, H, Kulasinski, K, Pfenninger, N, Zimmermann, T and Tingaut, P (2017). Highly Carboxylated Cellulose Nanofibers via Succinic Anhydride Esterification of Wheat Fibers and Facile Mechanical Disintegration. *Biomacromolecules* 18(1): 242-248.DOI: [10.1021/acs.biomac.6b01548](https://doi.org/10.1021/acs.biomac.6b01548)
- Shimizu, Y-i and Hayashi, J (1988). A new method for cellulose acetylation with acetic. *Sen'i Gakkaishi* 44(9): 451-456.DOI: [10.2115/fiber.44.9\\_451](https://doi.org/10.2115/fiber.44.9_451)
- Sprockel, O L, Prapaitrakul, W and Shivanand, P (1990). Permeability of Cellulose Polymers: Water Vapour Transmission Rates. *Journal of Pharmacy and Pharmacology* 42(3): 152-157.DOI: [10.1111/j.2042-7158.1990.tb05375.x](https://doi.org/10.1111/j.2042-7158.1990.tb05375.x)
- Tang, Z, Li, H, Hess, D W and Breedveld, V (2016). Effect of chain length on the wetting properties of alkyltrichlorosilane coated cellulose-based paper. *Cellulose* 23(2): 1401-1413.DOI: [10.1007/s10570-016-0877-2](https://doi.org/10.1007/s10570-016-0877-2)

- Tomé, L C, Freire, M G, Rebelo, L P N, Silvestre, A J D, Neto, C P, Marrucho, I M and Freire, C S R (2011). Surface hydrophobization of bacterial and vegetable cellulose fibers using ionic liquids as solvent media and catalysts. *Green Chemistry* 13(9): 2464-2470.DOI: 10.1039/C1GC15432J
- Wang, Y, Easteal, A J and Chen, X D (1998). Ethylene and oxygen permeability through polyethylene packaging films. *Packaging Technology and Science* 11(4): 169-178.DOI: 10.1002/(sici)1099-1522(199807/08)11:4<169::Aid-pts427>3.0.Co;2-q
- Wei, L, Agarwal, U P, Hirth, K C, Matuana, L M, Sabo, R C and Stark, N M (2017). Chemical modification of nanocellulose with canola oil fatty acid methyl ester. *Carbohydrate Polymers* 169: 108-116.DOI: <https://doi.org/10.1016/j.carbpol.2017.04.008>
- Wen, X, Wang, H, Wei, Y, Wang, X and Liu, C (2017). Preparation and characterization of cellulose laurate ester by catalyzed transesterification. *Carbohydrate Polymers* 168: 247-254.DOI: <https://doi.org/10.1016/j.carbpol.2017.03.074>
- Wu, Z, Xu, J, Gong, J, Li, J and Mo, L (2018). Preparation, characterization and acetylation of cellulose nanocrystal allomorphs. *Cellulose* 25(9): 4905-4918.DOI: 10.1007/s10570-018-1937-6
- Xu, J, Wu, Z, Wu, Q and Kuang, Y (2020). Acetylated cellulose nanocrystals with high-crystallinity obtained by one-step reaction from the traditional acetylation of cellulose. *Carbohydrate Polymers* 229: 115553.DOI: <https://doi.org/10.1016/j.carbpol.2019.115553>
- Yu, L, Zhang, Z, Tang, H and Zhou, J (2019). Fabrication of hydrophobic cellulosic materials via gas–solid silylation reaction for oil/water separation. *Cellulose* 26(6): 4021-4037.DOI: 10.1007/s10570-019-02355-7
- Yuan, H, Nishiyama, Y and Kuga, S (2005). Surface Esterification of Cellulose by Vapor-Phase Treatment With Trifluoroacetic Anhydride. *Cellulose* 12(5): 543-549.DOI: 10.1007/s10570-005-7136-2
- Zhang, Z, Sèbe, G, Rentsch, D, Zimmermann, T and Tingaut, P (2014). Ultralightweight and Flexible Silylated Nanocellulose Sponges for the Selective Removal of Oil from Water. *Chemistry of Materials* 26(8): 2659-2668.DOI: 10.1021/cm5004164
- Zhang, Z, Tingaut, P, Rentsch, D, Zimmermann, T and Sèbe, G (2015). Controlled Silylation of Nanofibrillated Cellulose in Water: Reinforcement of a Model Polydimethylsiloxane Network. *ChemSusChem* 8(16): 2681-2690.DOI: 10.1002/cssc.201500525
